# Supplementary material for: Ovarian transcriptomic study reveals the differential regulation of miRNAs and lncRNAs related to fecundity in different sheep
Source: PubMed Central journal article supplement (PMC5059661; doi:10.1038/srep35299), 2016-10-12

Supplementary information

**Ovarian transcriptomic study reveals the differential regulations of miRNAs and lncRNAs related to fecundity in different sheep**

Xiangyang Miao\* Qingmiao Luo Huijing Zhao Xiaoyu Qin

Institute of Animal Sciences, Chinese Academy of Agricultural Sciences,

Beijing, 100193, China

\*Corresponding author: Xiangyang Miao Institute of Animal Sciences, Chinese Academy of Agricultural Sciences, Beijing, 100193, China, Tel: 86-10-62895663, Fax: 86-10-62895663 (China), E-mail: miaoxy32@163.com, [mxy32@sohu.com](mailto:mxy32@sohu.com)

**Figure S1** Functional classification of differentially expressed genes identified from each comparison group based on Gene Ontology (GO). GO analysis was conducted to determine the enrichment of genes in biological process (BP), cellular components (CC) and molecular function (MF) with  $P < 0.05$ . (A) Han BB vs. Dorset; (B) Han BB vs. Han ++; (C) Han ++ vs. Dorset.

**Figure S2** KEGG pathway enrichment analysis of differentially expressed mRNAs identified from each comparison group with significance  $P < 0.05$ . (A) Han BB vs. Dorset; (B) Han BB vs. Han ++; (C) Han ++ vs. Dorset.

**Figure S3** Functional classification of target genes of differentially expressed

miRNAs identified from each comparison group based on Gene Ontology (GO). GO analysis was conducted to determine the enrichment of genes in biological process (BP), cellular components (CC) and molecular function (MF) with  $P < 0.05$ . (A) Han BB vs. Dorset; (B) Han BB vs. Han ++; (C) Han ++ vs. Dorset.

**Figure S4** KEGG pathway enrichment analysis of target genes of differentially expressed miRNAs identified from each comparison group with significance  $P < 0.05$ . (A) Han BB vs. Dorset; (B) Han BB vs. Han ++; (C) Han ++ vs. Dorset.

**Figure S5** Pathway-act-network analysis. A, Han BB vs. Dorset; B, Han ++ vs. Dorset; C, Han BB vs. Han ++.

**Figure S6** Validation of RNA-Seq data by quantitative real-time PCR. The relative expression level of each lncRNA was normalized to 18S rRNA, and each miRNA was normalized to 5S rRNA.

A Han BB vs. Dorset

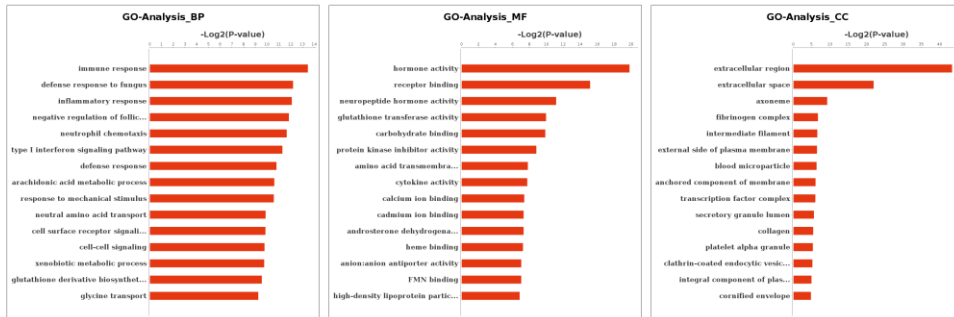

B Han BB vs. Han ++

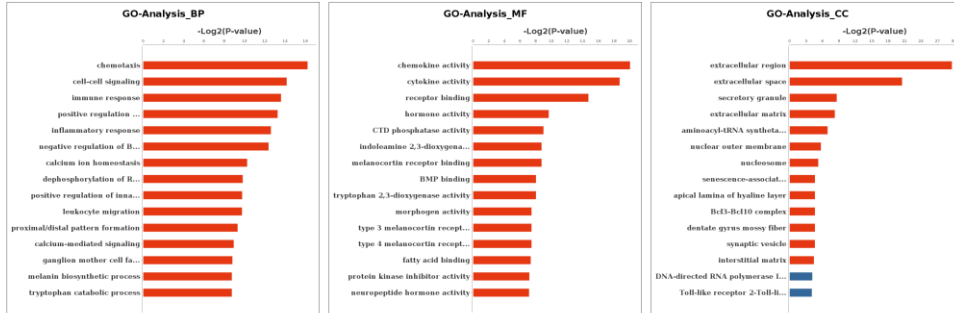

C Han++ vs. Dorset

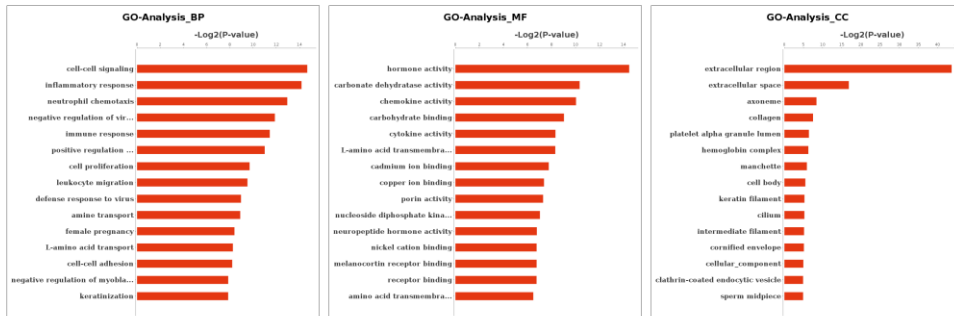

A Han BB vs. Dorset

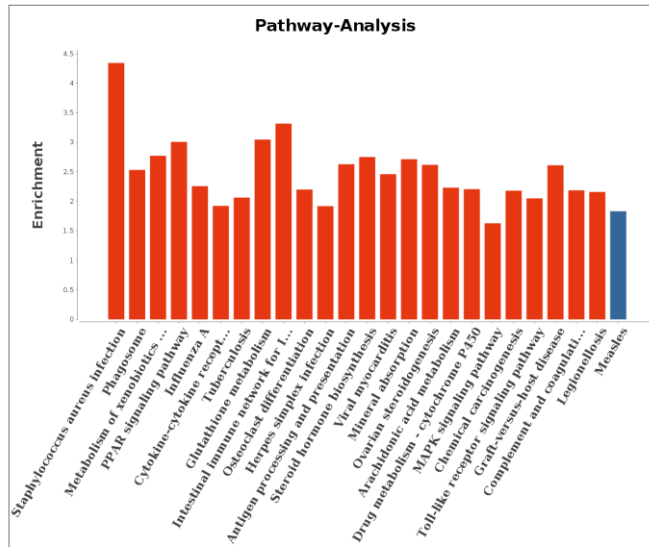

B Han BB vs. Han ++

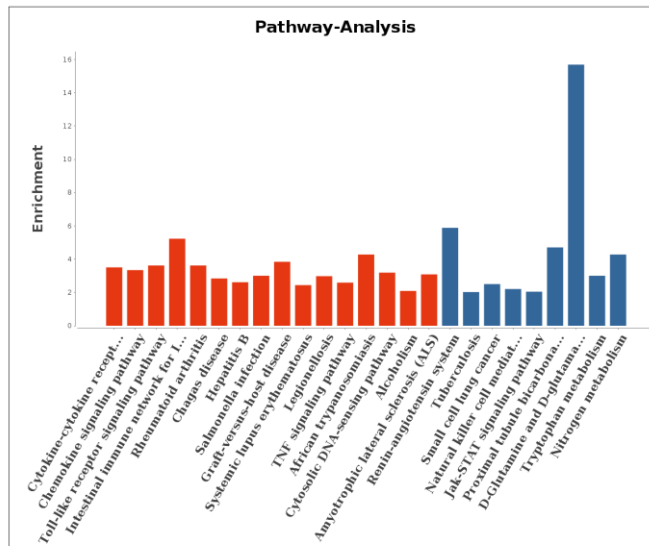

C Han ++ vs. Dorset

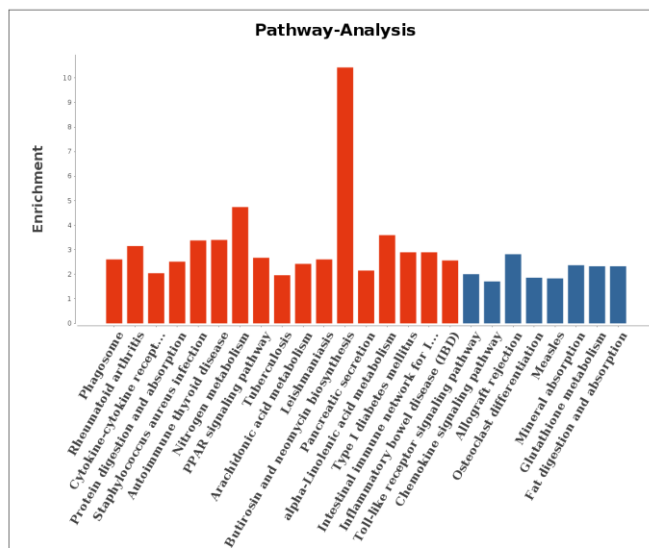

A Han BB vs. Dorset

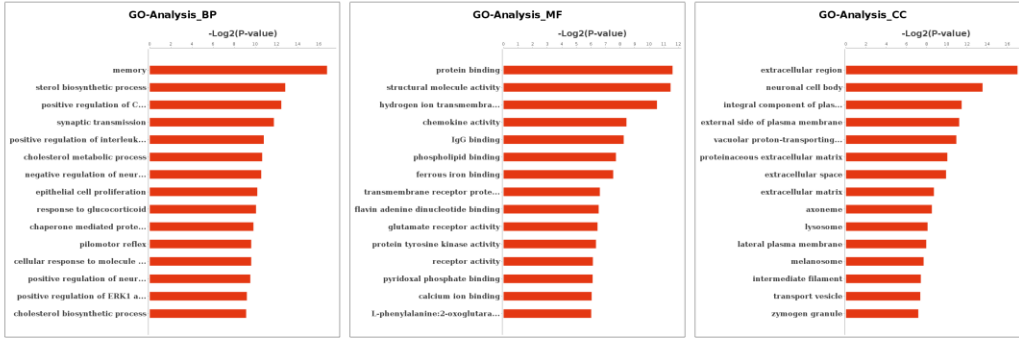

B Han BB vs. Han++

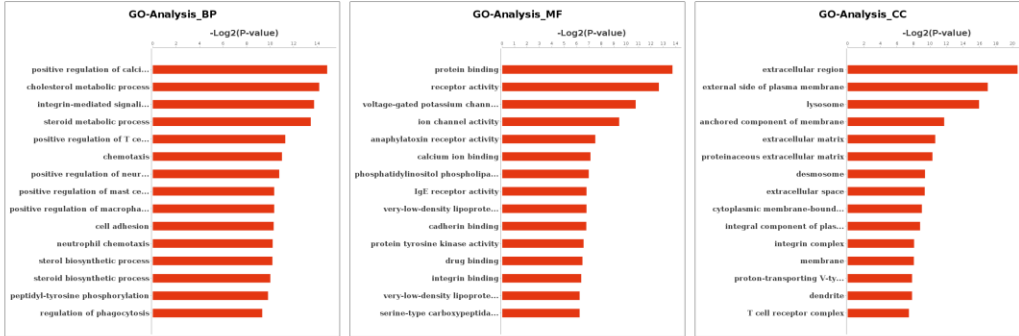

C Han++ vs. Dorset

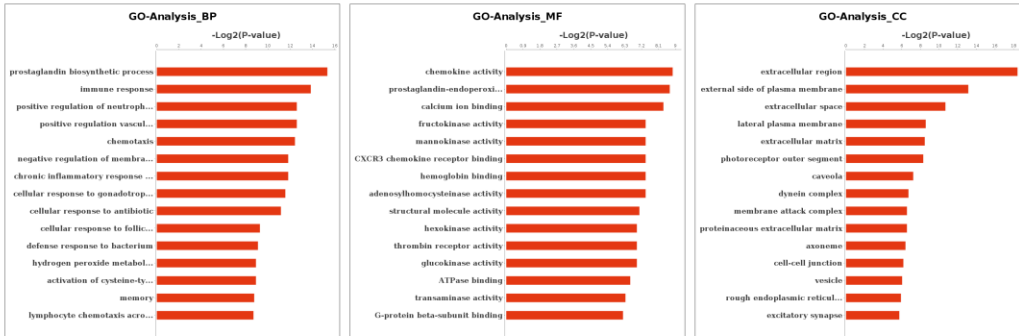

A Han BB vs. Dorset

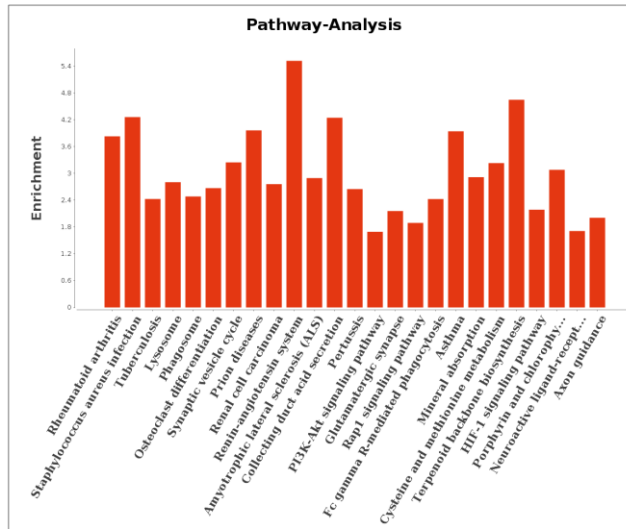

B Han BB vs. Han ++

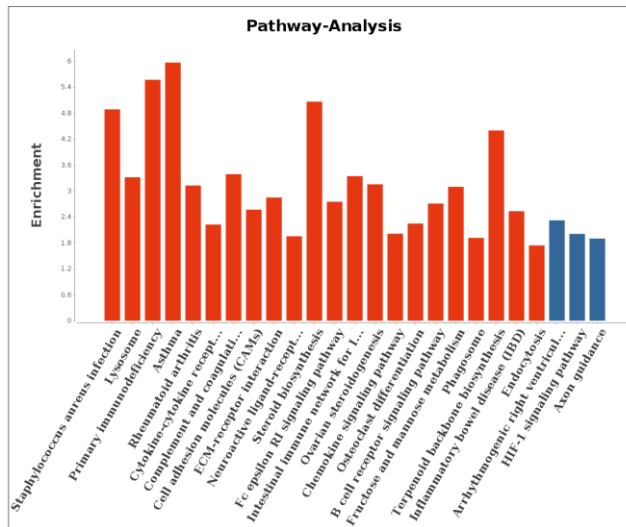

C Han ++ vs. Dorset

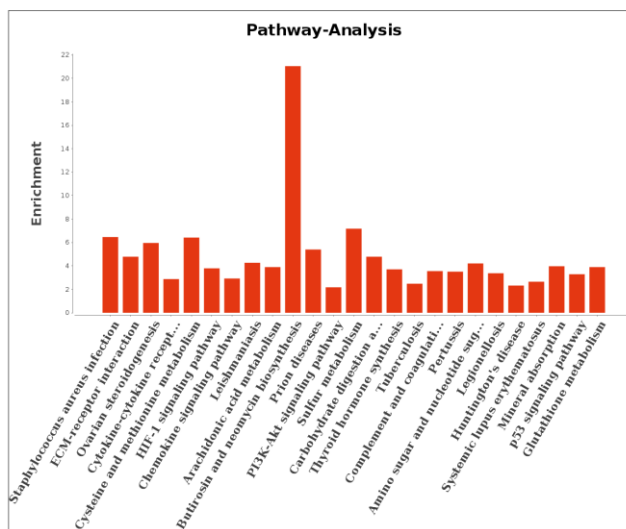

A

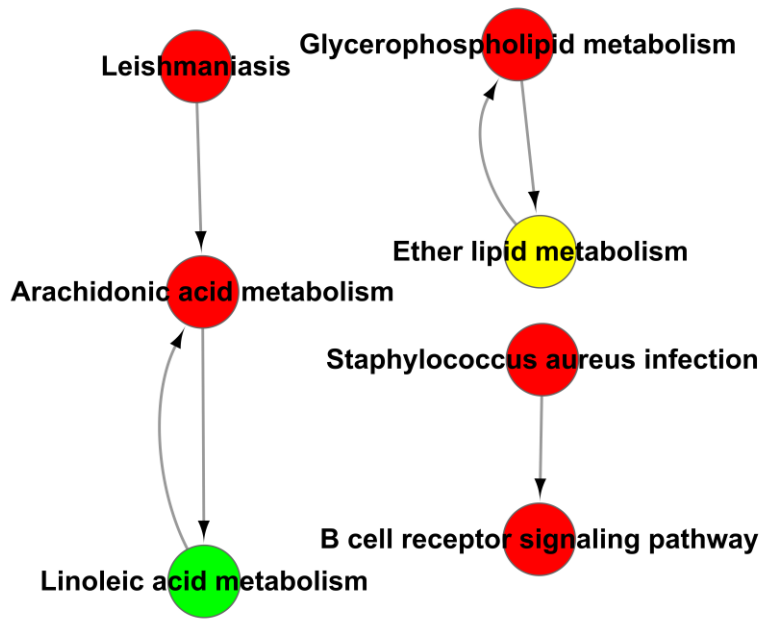

B

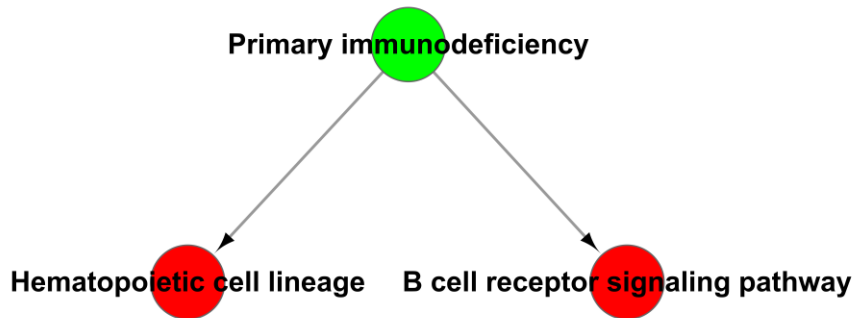

C

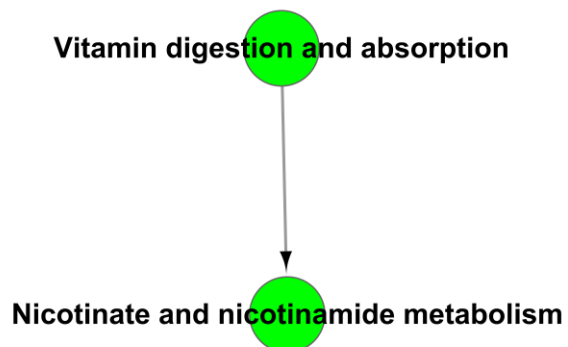

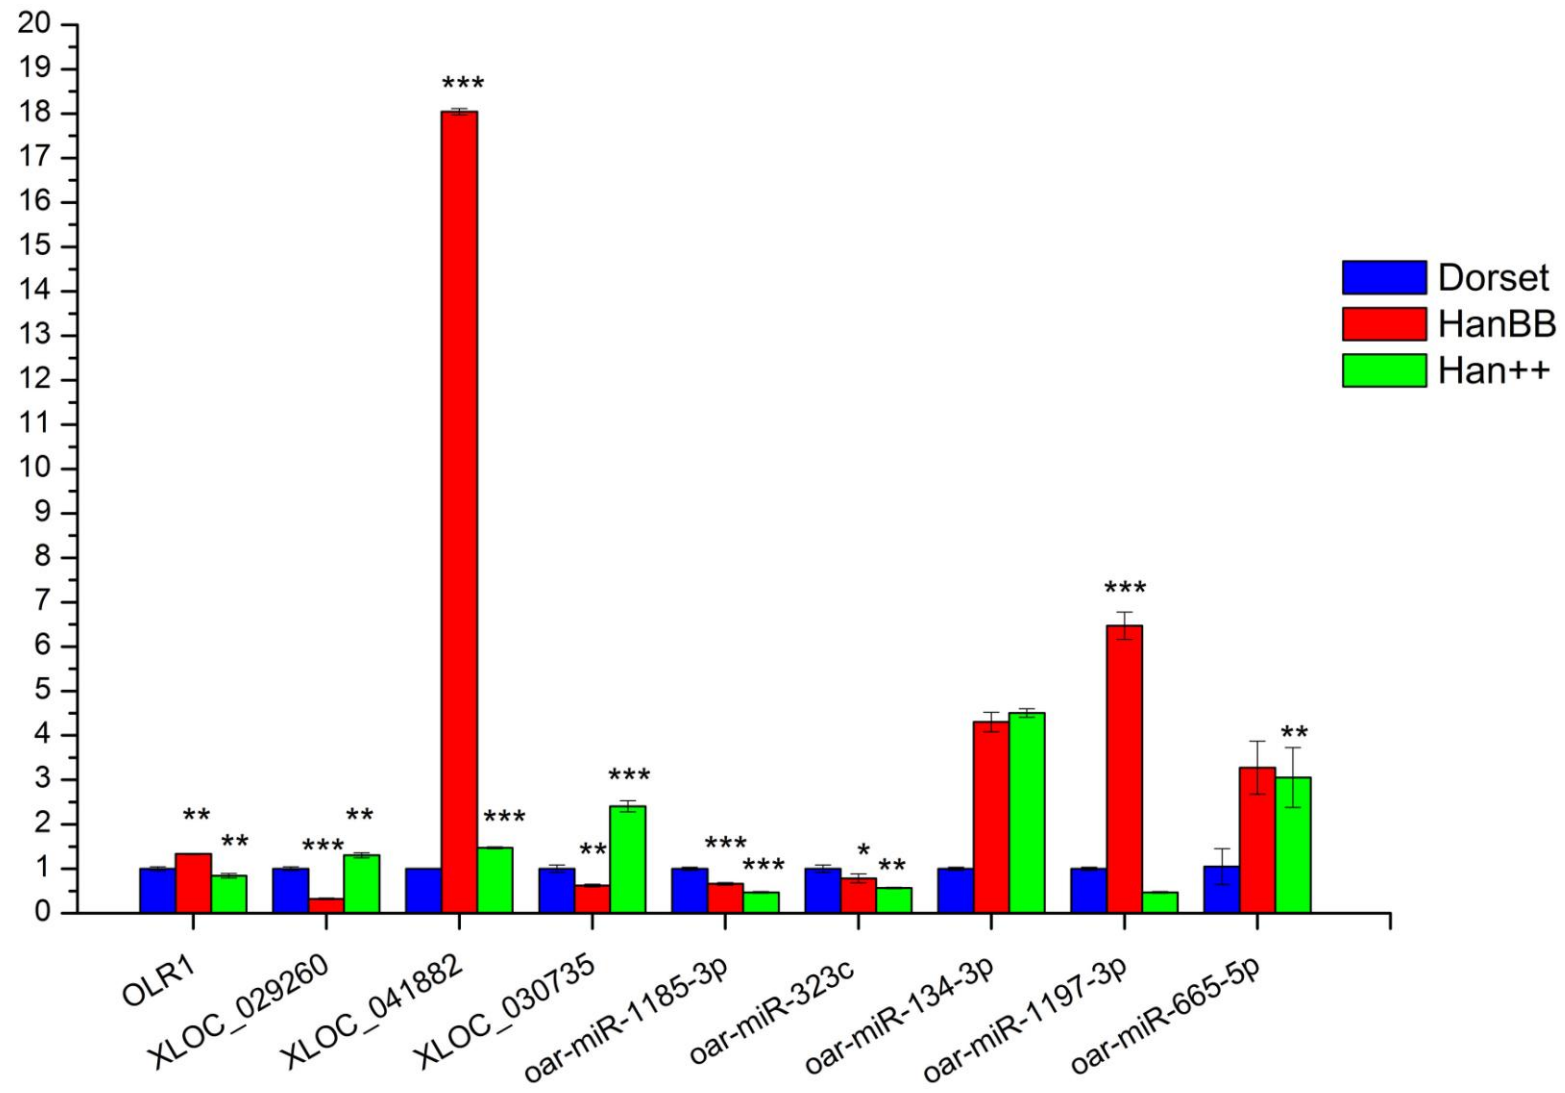

Supplement: srep35299-s1.pdf [file srep35299-s1.pdf]
